# Supplementary material for: Ribosome signatures aid bacterial translation initiation site identification
Source: PubMed Central journal article supplement (PMC5576327; doi:10.1186/s12915-017-0416-0), 2017-08-30
Supplement: 12915_2017_416_MOESM1_ESM.pdf [file 12915_2017_416_MOESM1_ESM.pdf]

## Supplemental information

|                                                                                               | Page |
|-----------------------------------------------------------------------------------------------|------|
| Supplementary_Fig_S1: Ribo-seq meta profiles at start and stop codons <i>S. Typhimurium</i> . | 2    |
| Supplementary_Fig_S2: Read length distributions at Shine Dalgarno motifs.                     | 3    |
| Supplementary_Fig_S3: Codon specific read length distributions.                               | 4    |
| Supplementary_Fig_S4: Additional prediction support.                                          | 4    |
| Supplementary_Fig_S5: Third codon periodicity and GC content.                                 | 5    |
| Supplementary_Fig_S6: Evidence for predicted novel translation initiation sites.              | 5    |
| Supplementary_Fig_S7: Ribo-seq meta profiles at start codons <i>E. coli</i> .                 | 6    |
| Supplementary_Fig_S8: Library read length distributions.                                      | 7    |
| Supplementary_Fig_S9: Read length adjustments.                                                | 7    |

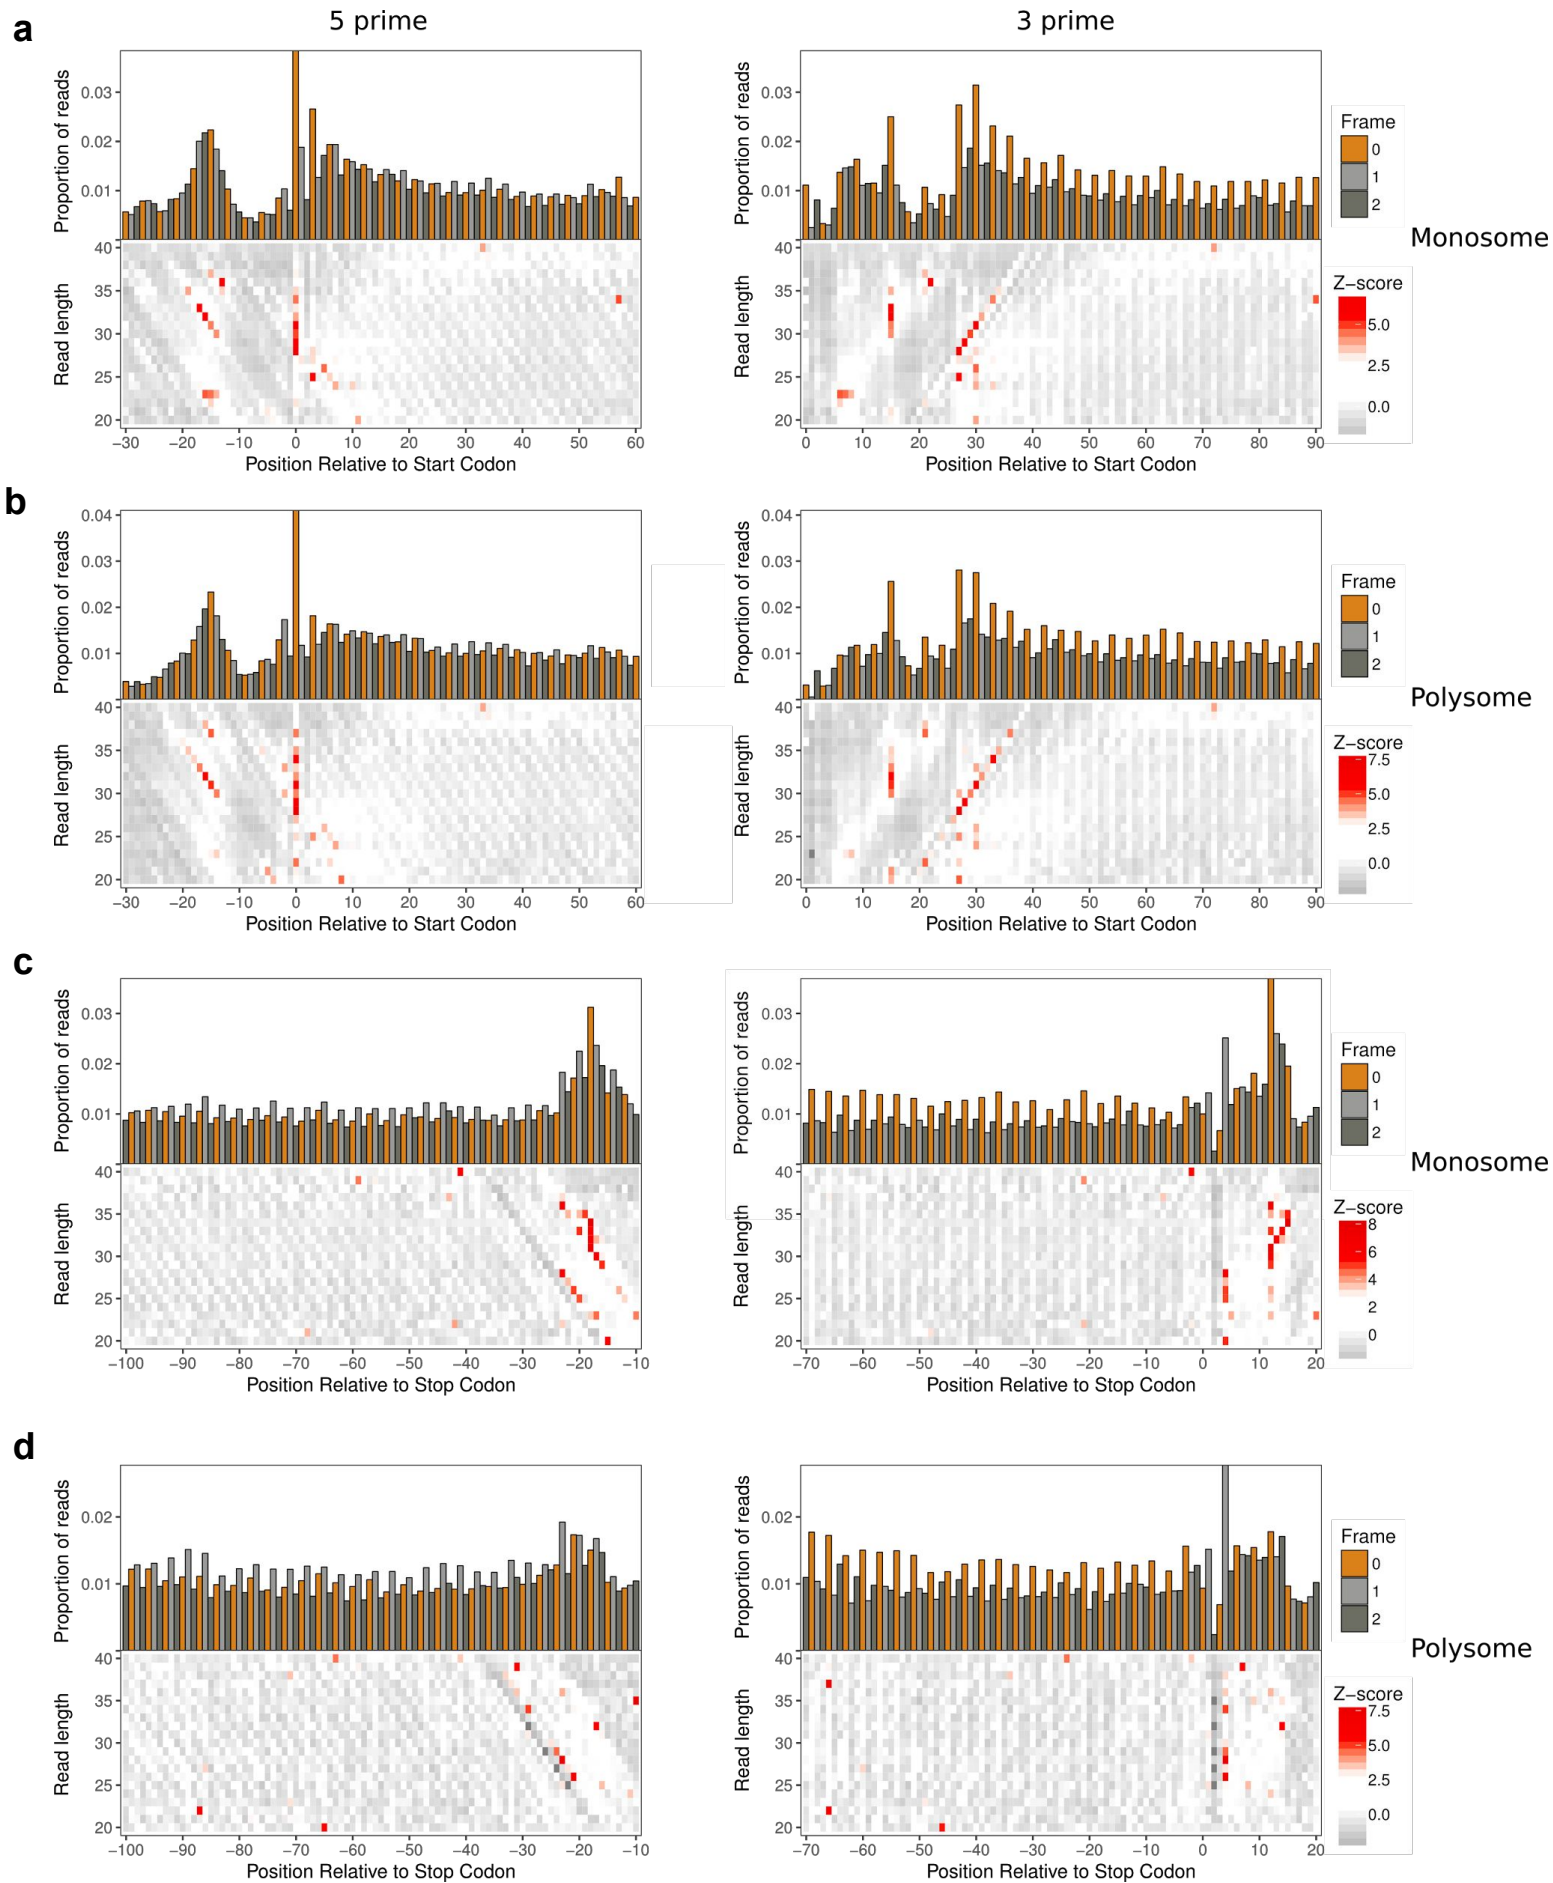

**Supplementary\_Fig\_S1: Ribo-seq meta profiles at start and stop codons - *S. Typhimurium***

Ribo-seq meta-profiles in windows around start codons for annotated genes (n=4205) in the *S. Typhimurium* genome, contributions from each gene are scaled to a sum of one. **(upper)** Proportion of 5 or 3' ribo-seq read counts per nucleotide position, coloured by codon position. **(lower)** Heatmaps of 5' or 3' ribo-seq read counts per length, coloured by z-score per protected read length.

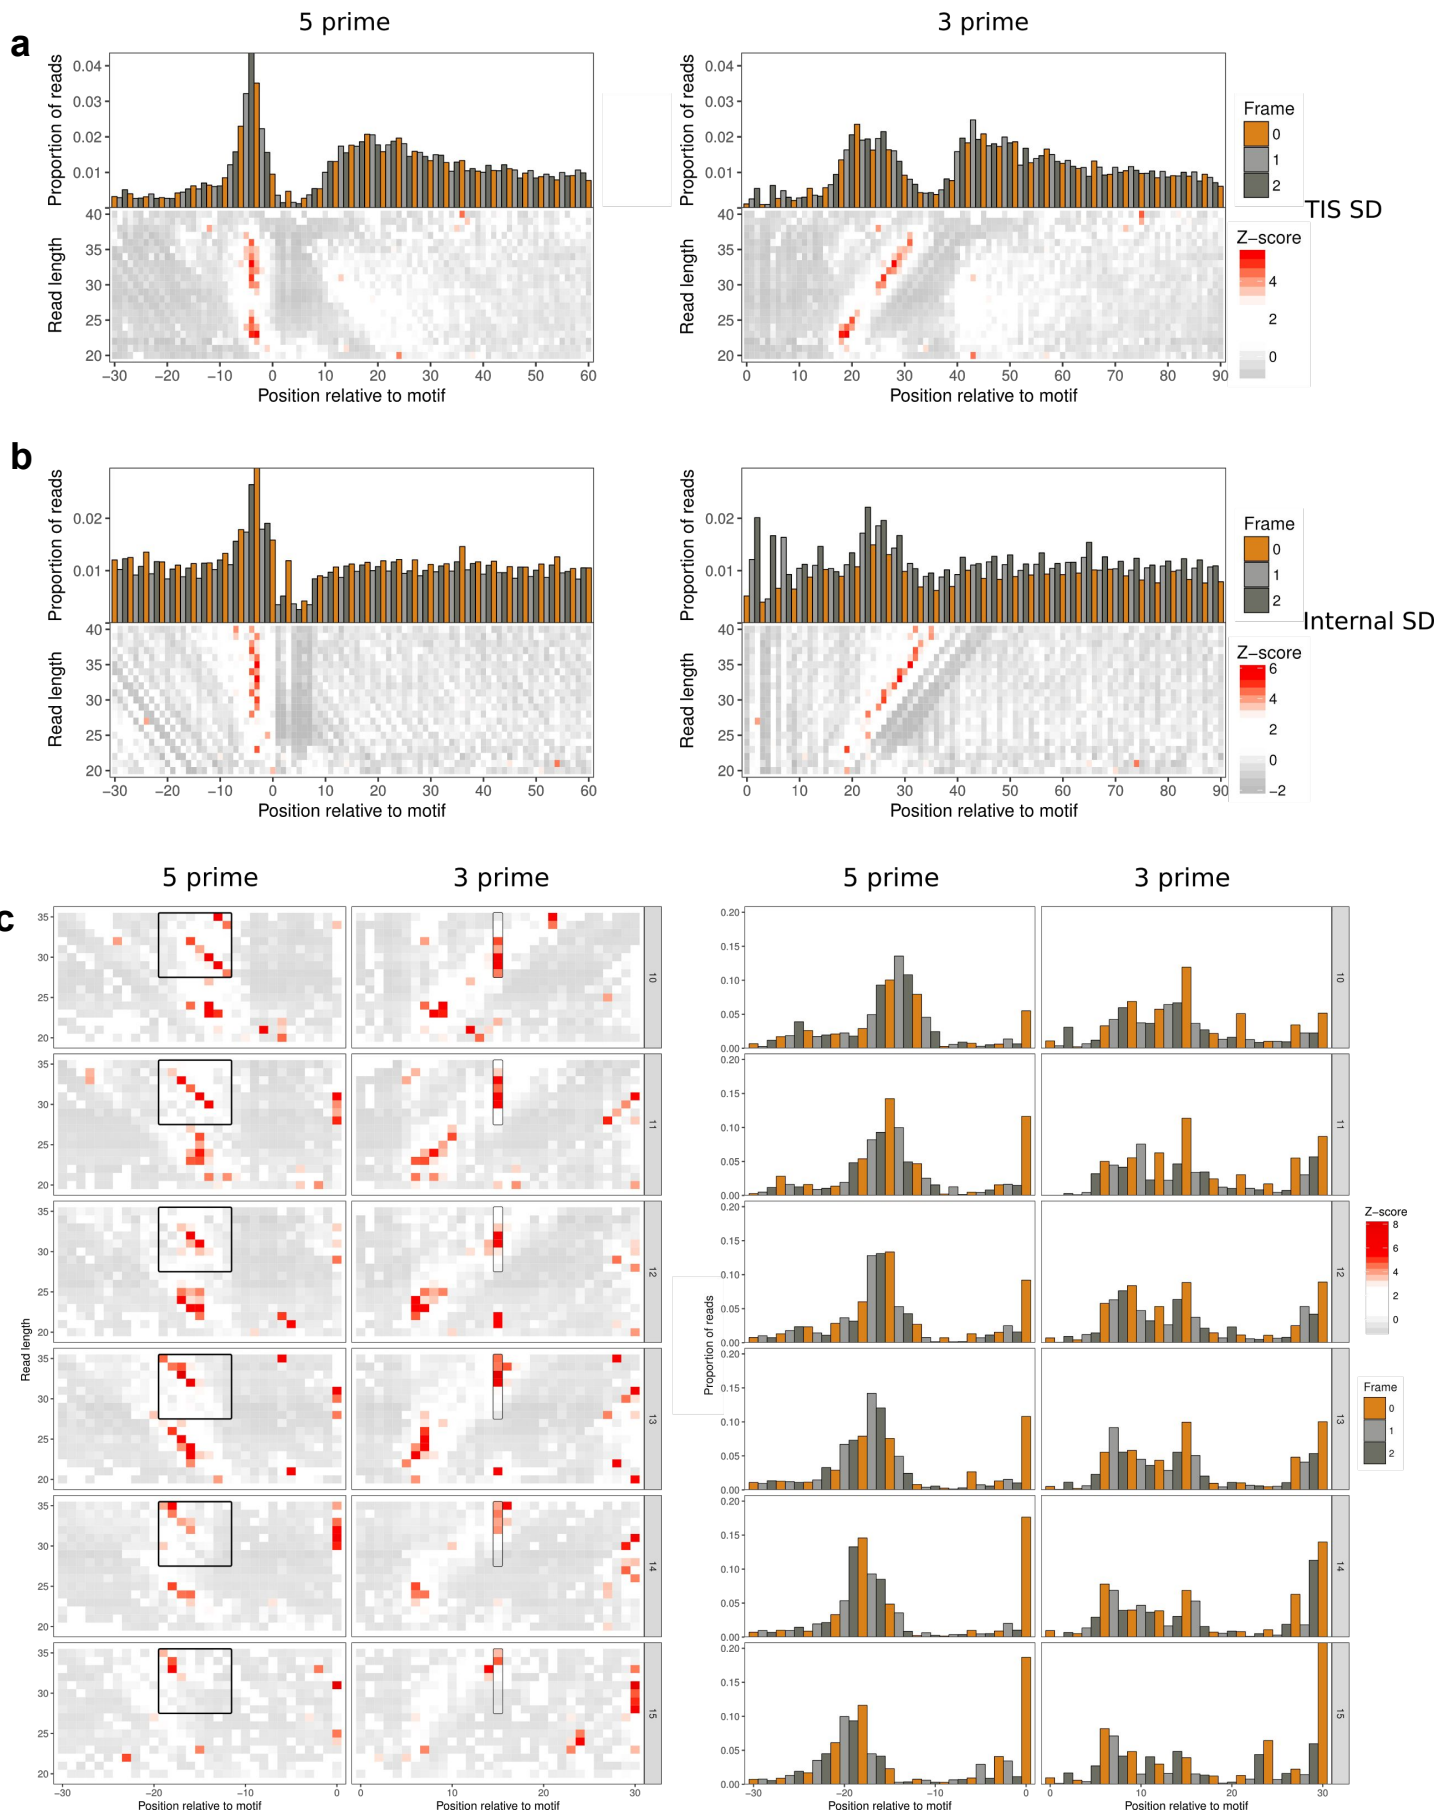

### Supplementary\_Fig\_S2: Read length distributions at Shine Dalgarno motifs

Ribo-seq meta-profiles in windows around shine dalgarno sequences immediately upstream of a TIS ( $n=736$ ) or at internal CDS positions ( $n=8564$ ) in the *S. Typhimurium* genome, contributions from each motif window are scaled to a sum of one. Barcharts show the proportion of 5' or 3' ribo-seq read counts per nucleotide position, coloured by codon position. Heatmaps show 5' or 3' ribo-seq read counts per length, coloured by z-score per read length. **(a)** In relation to SD motifs upstream of initiation codons. **(b)** In relation to internal SD motifs within CDS regions. **(c)** In relation to SD motifs upstream of initiation codons, faceted by distance between the SD motif and initiation codon (nt).

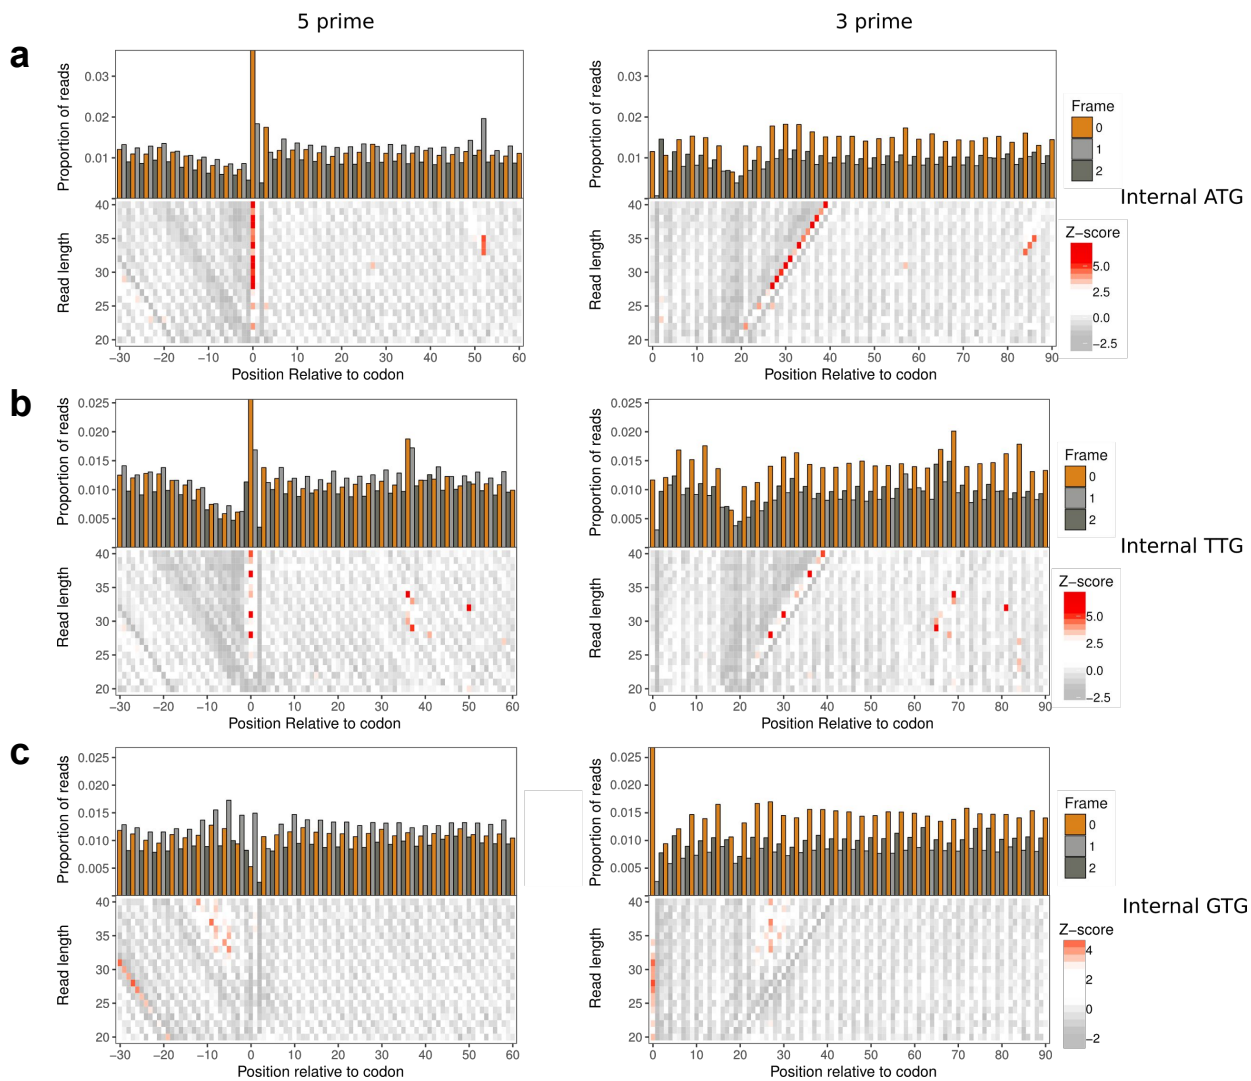

**Supplementary\_Fig\_S3: Codon specific read length distributions.**

*S. typhimurium* ribo-seq meta-profiles in windows around the most commonly used translation initiation codons at internal, in-frame CDS positions. Contributions from each codon window are scaled to a sum of one. **(upper)** Proportion of 5 or 3' ribo-seq read counts per nucleotide position, coloured by codon position. **(lower)** Heatmaps of 5' or 3' ribo-seq read counts per fragment length, coloured by z-score per read length. **(a)** ATG codons (n=35531). **(b)** GTG codons (n=35117). **(c)** TTG codons (n=17647).

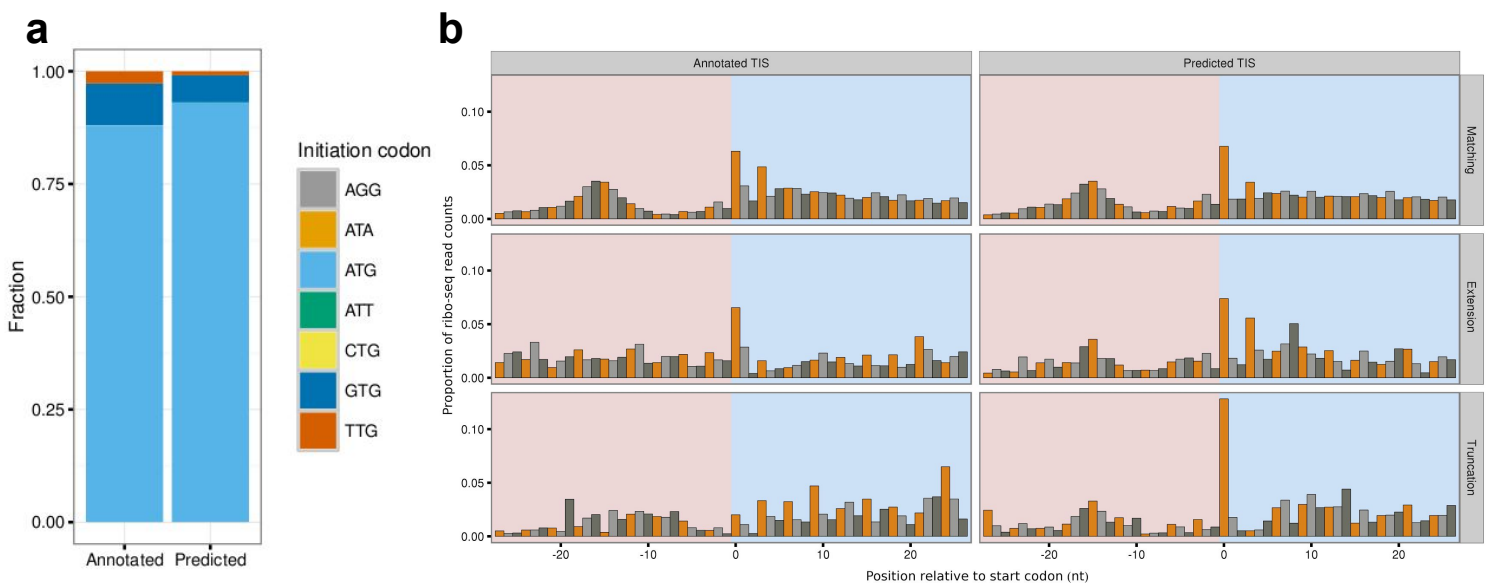

**Supplementary\_Fig\_S4: Additional prediction support**

**(a)** Showing the similarity in usage of different start codons between annotated (n=4653) and predicted (n=4334) *S. Typhimurium* ORFs. **(b)** Meta plots showing the proportion of scaled 5' ribo-seq read counts in relation to annotated or predicted translation initiation sites, for ORFs matching annotated genes (n=3853), predicted as extensions (n=214) or predicted as truncations (n=205), in the *S. Typhimurium* dataset. Contributions from each gene are scaled to a sum of one. Nucleotide positions are coloured by codon position. Upstream regions are highlighted in pink, downstream regions are highlighted in light blue.

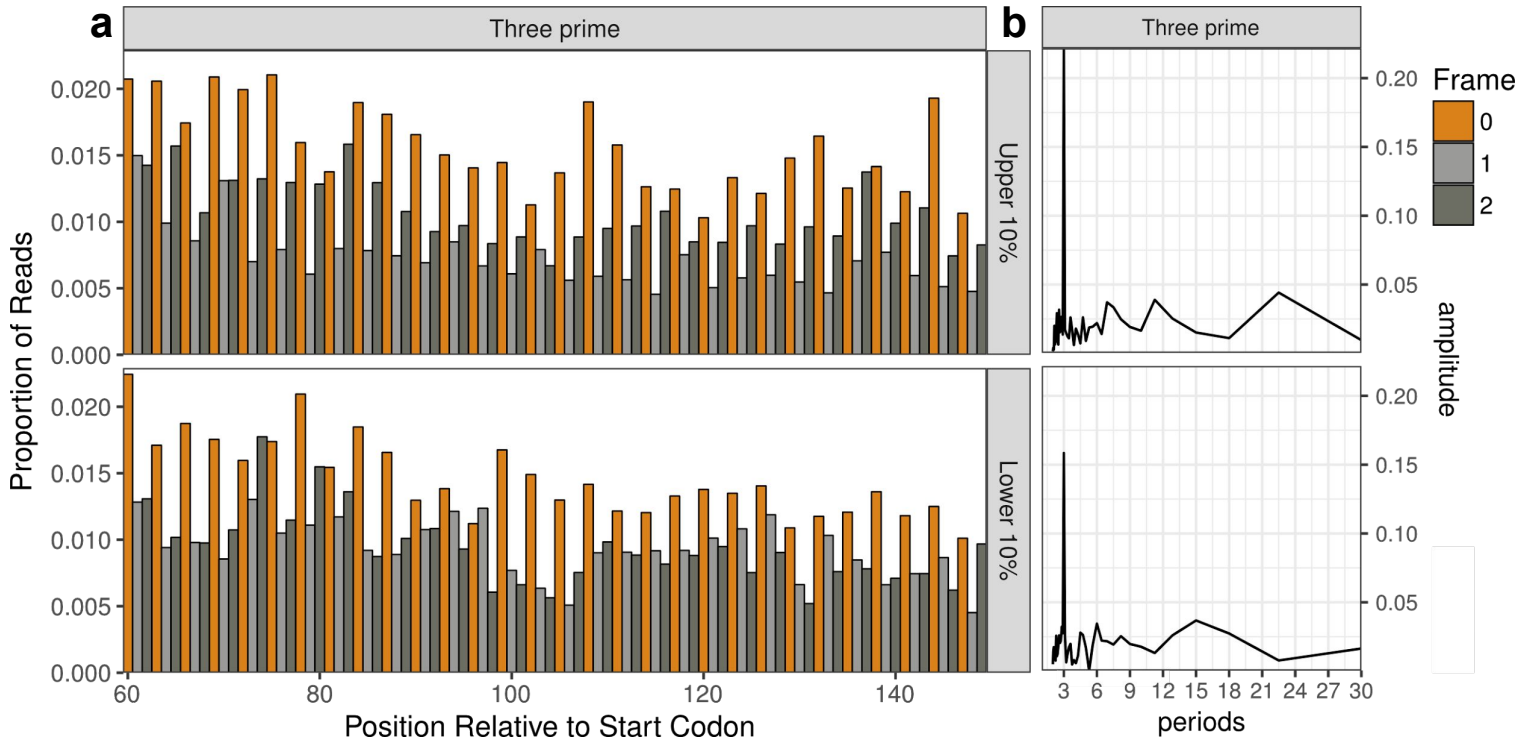

**Supplementary\_Fig\_S5: Third codon periodicity and GC content.**

(a) Proportion of 3' ribo-seq read counts per nucleotide position, from positions 60 - 150nt downstream of the annotated start codon in the *S. Typhimurium* genome, coloured by codon position. Contributions from each gene are scaled to a sum of one. (**upper**) the highest 10% of regions by third codon GC content (n=467). (**lower**) the bottom 10% of regions by third codon GC content (n=468). (**b**) fourier transform showing the periodicity in the distributions of (a).

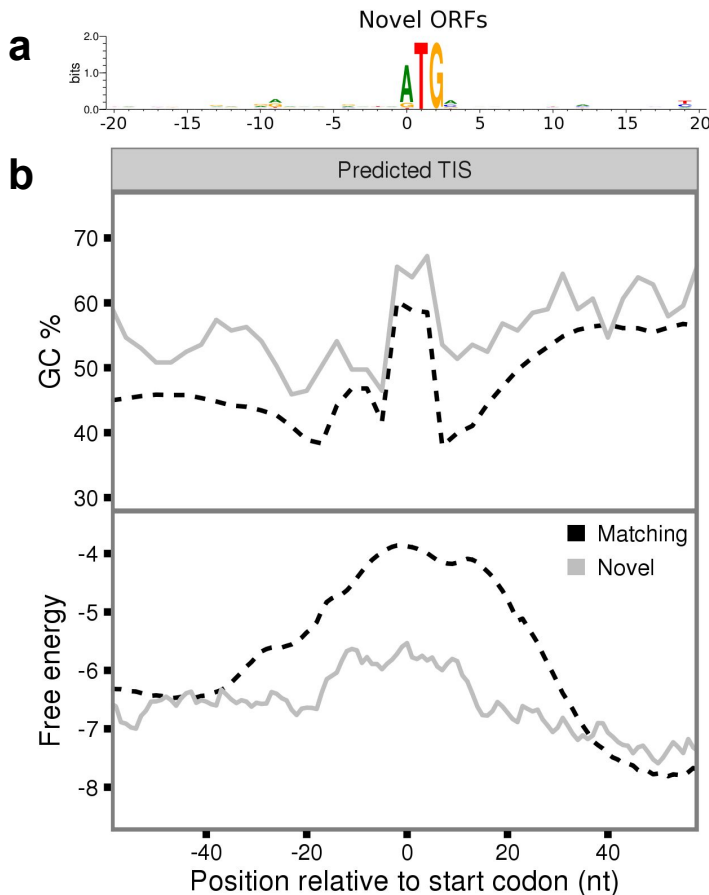

**Supplementary\_Fig\_S6: Evidence for predicted novel translation initiation sites.**

(a) Sequence motifs relation to predicted translation initiation sites (n=61), for sequences in all novel predicted ORFs in the *S. Typhimurium* dataset. (**B**) Meta-profiles in relation to annotated (n=3853) or predicted translation initiation sites. Black dotted lines representing ORFs matching annotated genes, grey lines represent novel predictions. (**upper**) Meta-profiles showing the percentage of GC content averaged in 9nt sliding windows, higher values downstream of the codon region are indicative of coding potential. (**lower**) Meta-profiles of free energy averaged in 39nt sliding windows, higher values represent a lower potential for secondary structure formation.

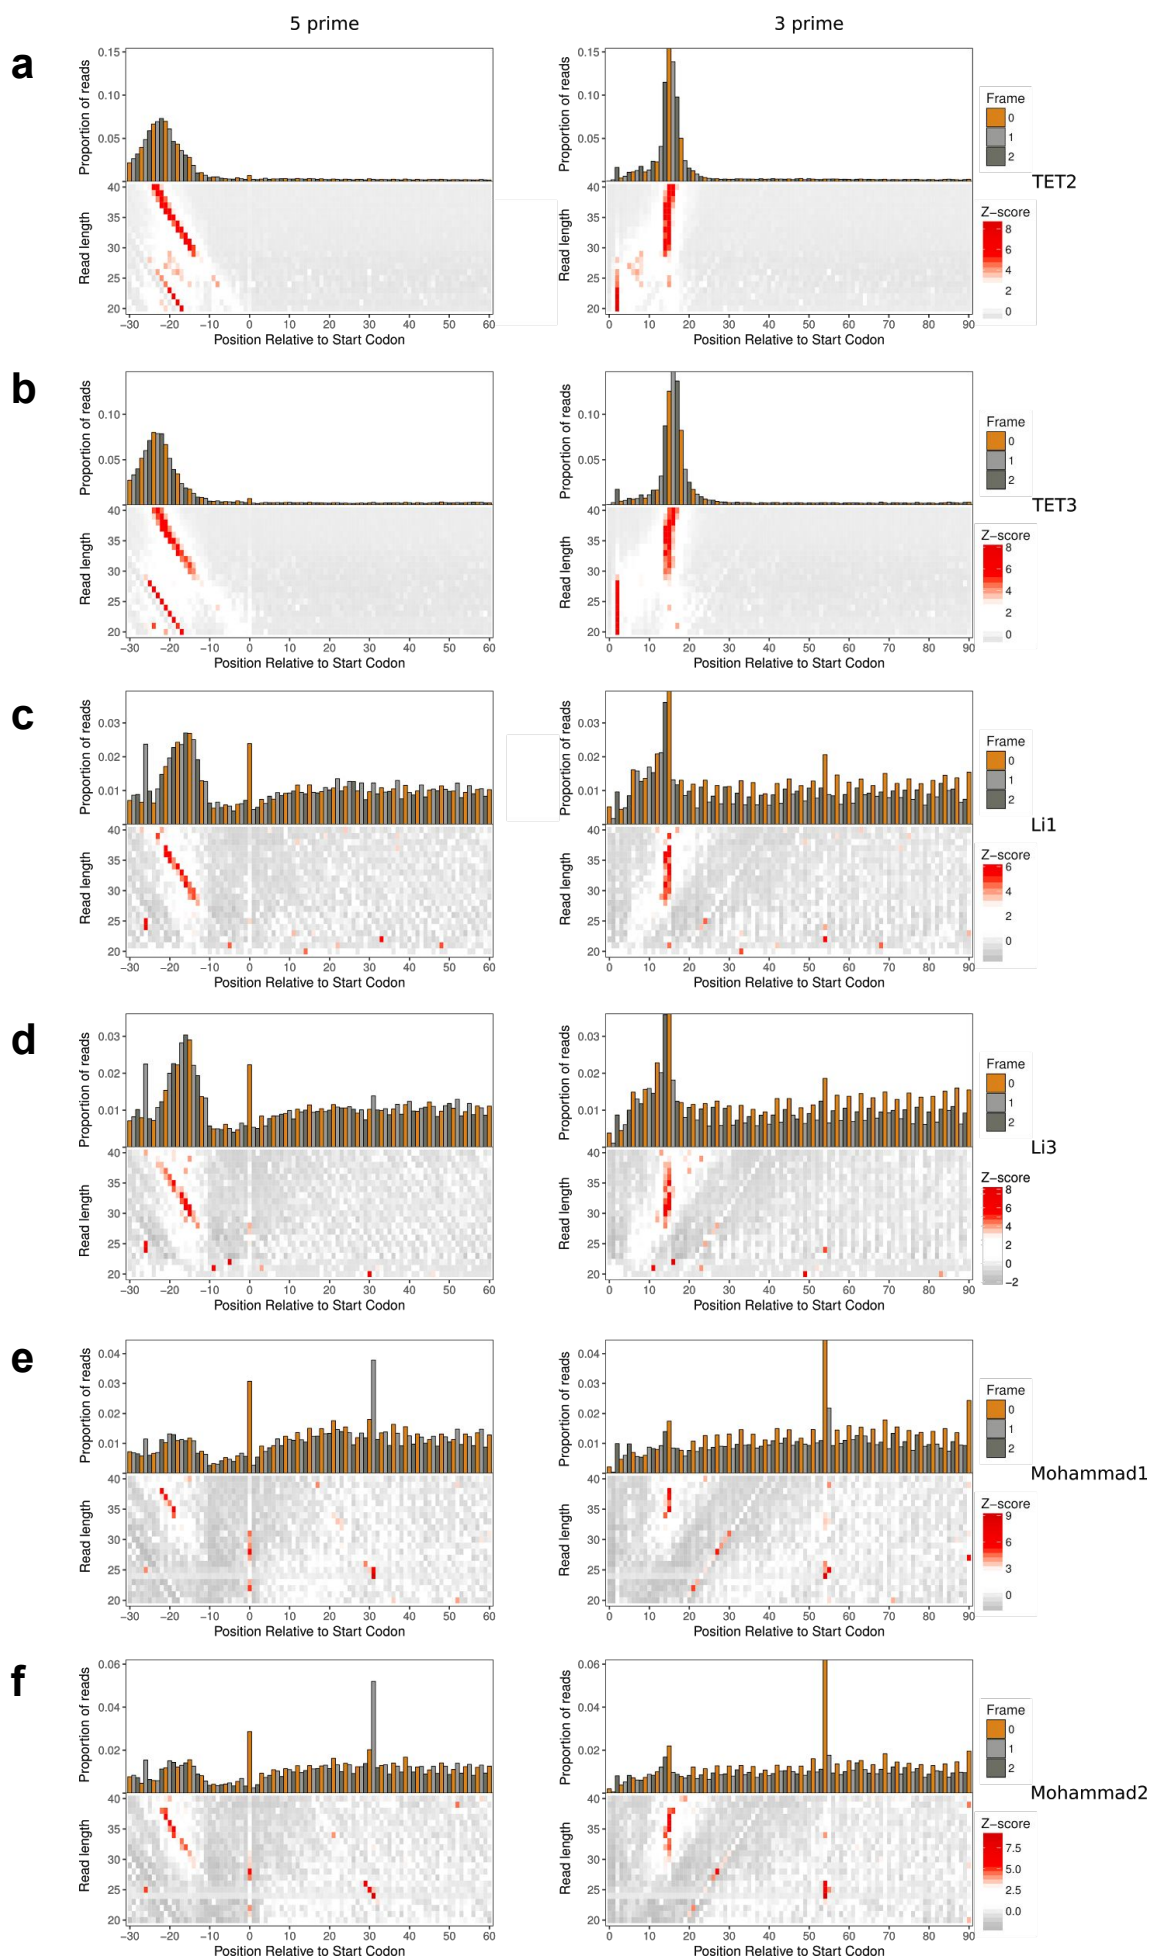

**Supplementary\_Fig\_S7: Ribo-seq meta profiles at start codons - *E. Coli***

Ribo-seq meta-profiles in windows around start codons for annotated genes ( $n=3726$ ) in the *E. coli* genome, contributions from each gene are scaled to a sum of one. **(upper)** Proportion of 5 or 3' ribo-seq read counts per nucleotide position, coloured by codon position. **(lower)** Heatmaps of 5' or 3' ribo-seq read length counts, coloured by z-score per read length.

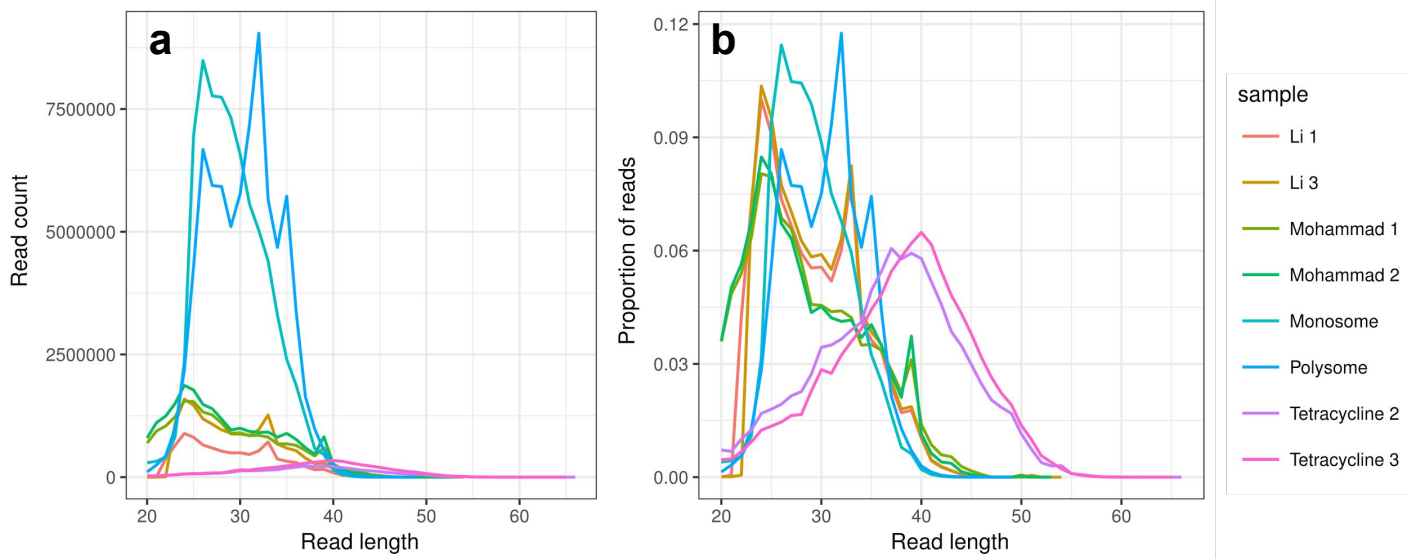

**Supplementary\_Fig\_S8: Library read length distributions**

Read length distributions of absolute (a) or proportional (b) counts of aligned ribo-seq reads per library.

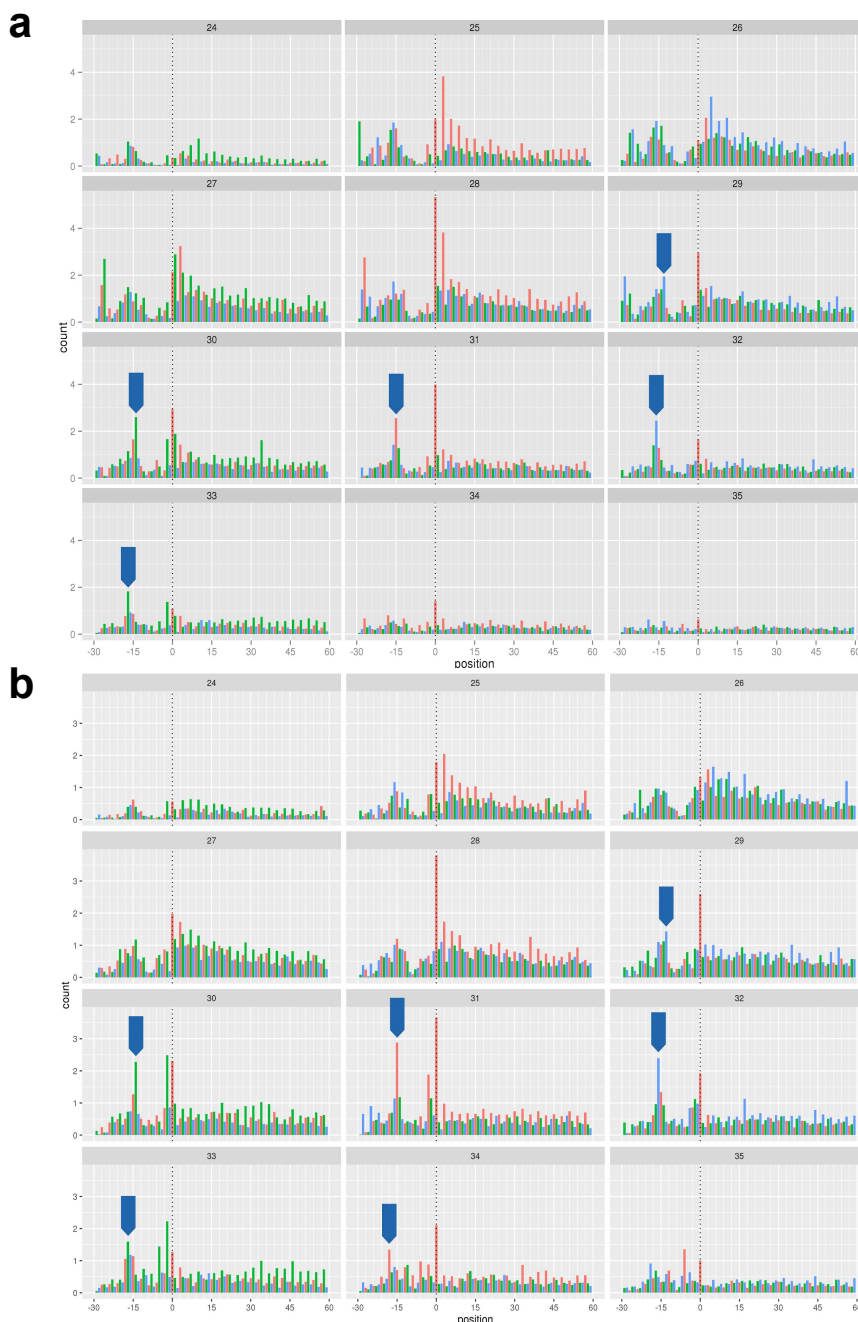

**Supplementary\_Fig\_S9: Read lengths adjustments**

The sum of scaled 5' ribo-seq counts from the (a) monosome or (b) polysome replicate, in -30 to +60nt windows around annotated start codons (n=4205) in *S. Typhimurium*, per read length, coloured by codon position. Contributions from each gene are scaled to a sum of one. Blue arrows indicate the peak corresponding to ribo-seq footprints translating the start codon.
